# Supplementary figures and images for: Identification of Sanguinarine Metabolites in Rats Using UPLC-Q-TOF-MS/MS
Source: MDPI journal article supplement (doi:10.3390/molecules28227641), 2023-11-17

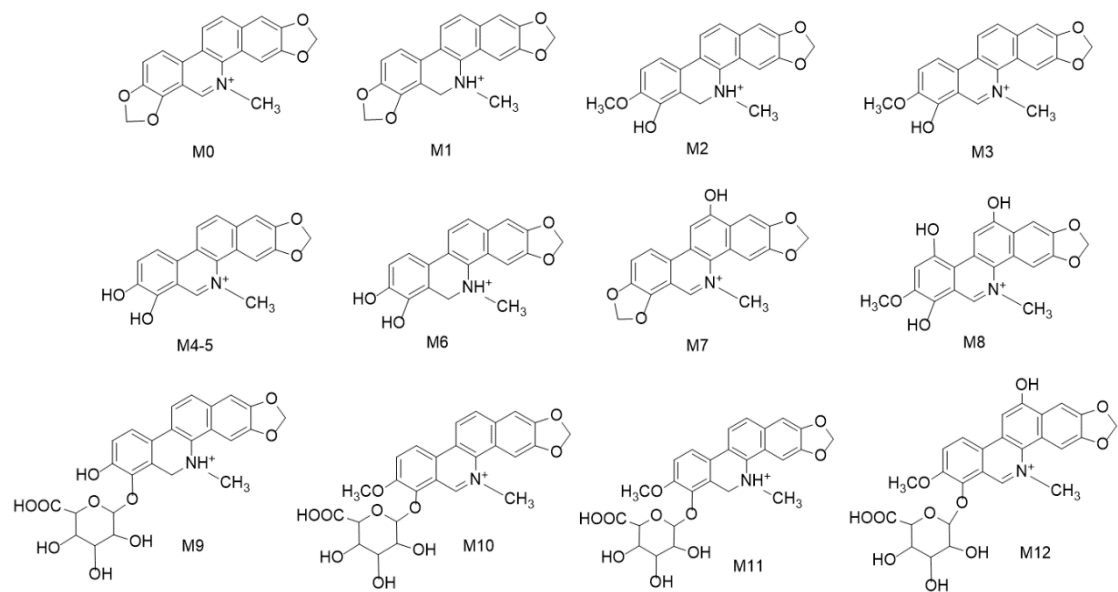

Figure S1. Structures of SAN and its metabolites

Supplement: s1 [file s1]
